# Supplementary material
Source: publisher figshare collection journal article supplement (https://tandf.figshare.com/ndownloader/files/36576161)

**Electronic Supporting Information (ESI)**

A new Cu3Al-layered double hydroxide heterogeneous catalyst for azide-alkyne [3+2] cycloaddition reaction in water

NOURA AFLAK*, LEKBIRA EL MERSLY, HICHAM BEN EL AYOUCHIA*, SALAH RAFQAH, HAFID ANANE, MIGUEL JULVEAND SALAH-EDDINE STIRIBA*

**1-benzyl-4-phenyl-1H-1,2,3-triazole (3a)**





White solid. Yield: 89%. M.P.: 130–132 °C. 1H NMR (400 MHz, CDCl3, *δ* ppm): 5.60 (s, 2H, CH2); 7.28–7.44 (m, 8H, CHar); 7.68 (s, 1H, CHtriazole); 7.81–7.83 (d, 2H, CHar). 13C NMR (100 MHz, CDCl3, *δ* ppm): 54.4 (CH2); 119.5 (CHar); 125.9 (3CHar); 127.8 (2CHar); 128.2 (2CHar); 129.2 (CHtriazole); 131.5 (Car); 135.0 (Car); 148.3 (CTriazole). HRMS (FAB+) *m/z*: Calcd. for C15H14N3: 236.1188; Found: 236.1177.

**1-benzyl-4-p-tolyl-1H-1,2,3-triazole (3b)**





White solid. Yield: 70%. M.P.: 152–154 °C. 1H NMR (400 MHz, CDCl3, *δ* ppm): 2.38 (s, 3H, CH3); 5.56 (s, 2H, CH2); 7.213–7.401(m, 7H, CHar); 7.52 (s, 1H, CHtriazole); 7.58 (d, 2H, CHar). 13C NMR (100 MHz, CDCl3, *δ* ppm): 21.3 (CH3) 54.2 (CH2); 119.2 (CHar); 125.6 (2CHar); 127.7 (2CHar); 128.0 (2CHar); 128.7 (2CHar); 129.1 (Car); 129.5 (CHtriazole); 134.8 (Car); 138.0 (Car); 148.0 (Ctriazole). HRMS (FAB+) *m/z*: Calcd. for C15H14N3: 250.1344; Found: 250.1327.

**Ethyl 1-benzyl-1H-1,2,3-triazole-4-carboxylate (3c)**





White solid. Yield: 86%. M.P.: 83-85°C. 1H NMR (400 MHz, CDCl3, δ ppm): 1.35-1.40 (t, 3H, CH3); 4.35-4.42 (q, 4H, OCH2); 5.57 (s, 2H, CH2); 7.26-7.29 (m, 3H, CHar); 7.37-7.4 (m, 3H, CHar); 7.96 (s, 1H, CHtriazole). 13C NMR (100 MHz, CDCl3, δ ppm): 14.4 (CH3); 54.6 (CH2); 61.4 (CH2); 127.4 (CHar); 128.4 (2CHar); 129.3 (CHar); 129.4 (CHar); 133.8 (CHtriazolic); 140.7 (Ctriazolic); 160.8 (CO). HRMS (FAB+) *m/z*: Calcd. for C12H14N3O2: 232.1086; Found: 232.1087.

**1-benzyl-4-(phenoxymethyl)-1H-1,2,3-triazole (3d)**





White solid. Yield: 92%. M.P.: 122-123°C. 1H NMR (400 MHz, CDCl3, δ ppm): 5.21 (s, 2H, CH2); 5.55 (s, 2H, OCH2); 6.96-7.00 (q, 3H, CHar); 7.28-7.33 (q, 4H, CHar); 7.37-7.41 (m, 3H, CHar); 7.57 (s, 1H, CHtriazole). 13C NMR (100 MHz, CDCl3, δ ppm): 54.7 (CH2); 62.5 (CH2); 115.2 (2CHar); 121.6 (CHtriazole); 128.5 (2CHar); 129.2 (2CHar); 129.5 (4CHar); 123.0 (Car); 134.9 (Ctriazole); 158.6 (Car).  HRMS (FAB+) *m/z*: Calcd. for C16H15N3O: 266.1288; Found: 266.1289.

**(1-benzyl-1H-1,2,3-triazol-4-yl)methyl benzoate (3e)**





White solid. Yield: 90%. M.P.: 122-123°C. 1H NMR (400 MHz, CDCl3, δ ppm):  5.47 (s, 2H, CH2); 5.54 (s, 2H, CH2); 7.31-7.38 (m, 5H, CHar); 7.40-7.46 (dd, 1H, CHar); 7.57 (t, 1H, CHar); 7.70 (s, 1H, CHtriazole); 8.03-8.05 (d, 2H, CHar). 13C NMR (100 MHz, CDCl3, δ ppm): 54.8 (CH2); 58.4 (CH2); 128.6 (CHtriazole); 128.7 (2CHar); 129.3 (2CHar); 129.6 (2CHar); 130.1 (4CHar); 133.6 (Car); 134.7 (Ctriazole); 153.2 (Car); 166.8 (Ccarbonyl).  HRMS (FAB+) *m/z*: Calcd. for C17H15N3O2: 294.1237; Found: 294.1241.

**4-((4-phenyl-1H-1,2,3-triazol-1-yl)methyl)pyridine (3f)**





White solid. Yield: 97%. M.P.: 81.3°C. 1H NMR (400 MHz, CDCl3, δ ppm): 5.73 (s, 2H, CH2); 7.25-7.36 (m, 2H, CHAr); 7.41-7.46 (m, 3H, CHAr); 7.69-7.75 (m, 1H, CHar); 7.83-7.87 (m, 1H, CHar); 7.96 (s, 1H, CHTriazole); 8.64 (s, 2H, CHar). 13C NMR (100 MHz, CDCl3, δ ppm): 56.11 (CH2); 120.57 (2 CHar); 124.00 (2 CHar); 126.13 (CHar); 128.58 (2CHar); 129.21 (Car); 130.93 (CHTriazole); 137.84 (Car); 150.13 (CTriazole); 154.91 (2 CHar). HRMS (FAB+) *m/z*: Calcd. for C14H12N4: 236.1062; Found: 237.1132.

**1-(4-methoxybenzyl)-4-phenyl-1H-1,2,3-triazole (3g)**





White solid. Yield: 89%. M.P.: 134-135°C. 1H NMR (400 MHz, CDCl3, δ ppm): 3.73 (s, 3H, OCH3); 5.43 (s, 2H, CH2); 6.82-6.85 (d, 2H, CHar); 7.18-7.82 (m, 5H, CHar); 7.54 (s, 1H, CHtriazole); 7.69-7.72 (d, 2H, CHar). 13C NMR (100 MHz, CDCl3, δ ppm): 53.9 (CH2); 55.4 (CH3); 114.6 (2CHar); 119.3 (2CHar); 125.8 (2CHar); 128.2 (CHar); 128.9 (2CHar); 129.8 (Car); 128.8 (2CHar); 130.7 (Car+CHtriazolic); 148.2 (Ctriazolic); 160.1 (CHar). HRMS (FAB+) *m/z*: Calcd. for C16H16N3O: 266.1293; Found: 266.1286.

**1,4-diphenyl-1H-1,2,3-triazole (3h)**





White solid. Yield: 53%. M.P.: 183–184 °C. 1H NMR (400 MHz, CDCl3, *δ* ppm): 7.33–7.4 (m , 2H, CHar) ; 7.44–7.49 (t, 2H, CHar); 7.53–7.58 (t, 2H, CHar); 7.79–7.81 (d, 2H, CHar); 7.92– 7.94 (d, 2H, CHar); 8.22 (s, 1H, CHtriazole). 13C NMR (100 MHz, CDCl3, *δ* ppm): 119.0 (2CHar); 120.98 (Car); 126.3 (2CHar); 129.0 (CHar); 129.3 (CHar); 129.37 (2CHar); 130.2 (2CHar); 130.34 (CHtriazole); 130.7 (Car); 137.47 (Ctriazole). HR-MS (FAB+) *m/z*: Calcd. for C14H12N3: 222.1031; Found: 222.1029.

**4-(phenoxymethyl)-1-phenyl-1H-1,2,3-triazole (3i)**





White solid. Yield: 87%. M.P.: 87-88°C. 1H NMR (400 MHz, CDCl3, δ ppm): 5.23 (s, 2H, CH2); 6.89-6.97 (m, 3H, CHar ); 7.18-7.27 (dd, *J*= 36 Hz, 2H, CHar ); 7.37-7.45 (m ,3H, CHar ); 7.65-7.68 (d, *J*= 12 Hz, 2H, CHar ); 7.98 (s, 1H, CHTriazole ). 13C NMR (100 MHz, CDCl3, δ ppm): 62.4 (CH2); 115.2 (2CHar); 121.0 (CHTriazole); 121.3 (CHar); 121.8 (2CHar); 129.3 (Car); 130.0 (CHar); 130.2 (2CHar); 137.4 (2CHar); 145.5 (CTriazole); 158.6 (Car). HRMS (FAB+) *m/z*: Calcd. for C15H13N3O: 252.1130; Found: 252.1129.

**(1-phenyl-1H-1,2,3-triazol-4-yl)methyl benzoate (3j)**





White solid. Yield: 89%. M.P.: 110-111°C. 1H NMR (400 MHz, CDCl3, δ ppm): 5.59 (s, 2H, CH2); 7.46-7.59 (m, 5H, CHAr ); 7.75-7.77 (d, J= 8 Hz, 2H, CHAr); 8.07-8.11 (d , J= 9 Hz, 2H, CHAr); 8.16 (s, 1H, CHTriazole). 13C NMR (100 MHz, CDCl3, δ ppm)**:** 58.45 (CH2); 118.65 (CHTriazole); 121.07 (CAr); 122.69 (2CHAr); 124.12 (2CHAr); 128.83 (CHAr); 129.34 (2CHAr); 130.18 (CAr); 133.67 (CAr); 137.32 (CHAr); 144.09 (CTriazole); 166.93 (CCarbonyle). HR-MS (FAB+) m/z: Calcd. for C16H13N3O2: 280.1080; Found: 280.1080.

**1-Benzyl-4-phenyl-1H-1,2,3-triazole (3a)**

**1- Benzyl-4-p-tolyl-1H-1,2,3-triazole (3b)**

**Ethyl 1-benzyl-1H-1,2,3-triazole-4-carboxylate (3c)**


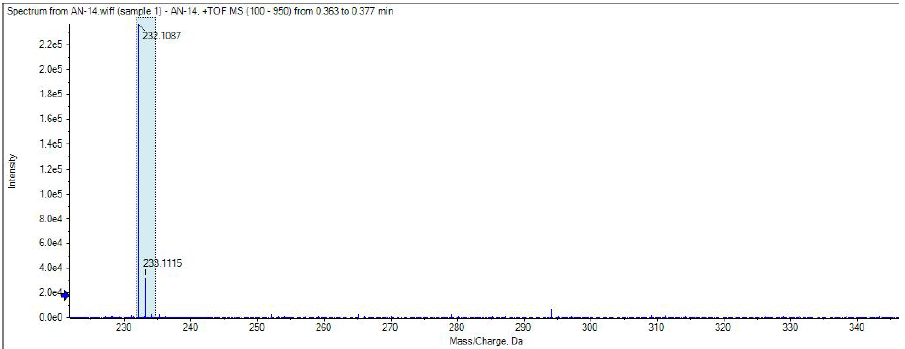


**1-benzyl-4-(phenoxymethyl)-1H-1,2,3-triazole (3d)**

**(1-benzyl-1H-1,2,3-triazol-4-yl)methyl benzoate (3e)**

**4-((4-phenyl-1H-1,2,3-triazol-1-yl)methyl)pyridine (3f)**


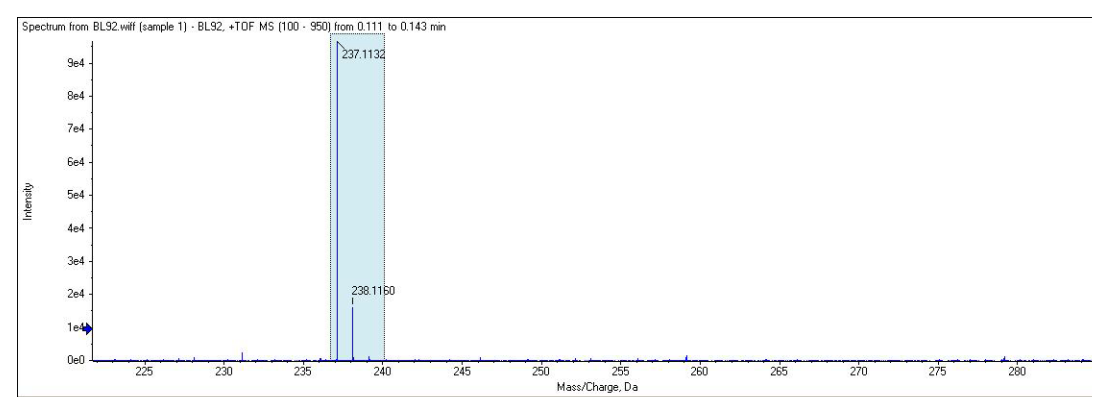


**1-(4-methoxybenzyl)-4-phenyl-1H-1,2,3-triazole (3g)**


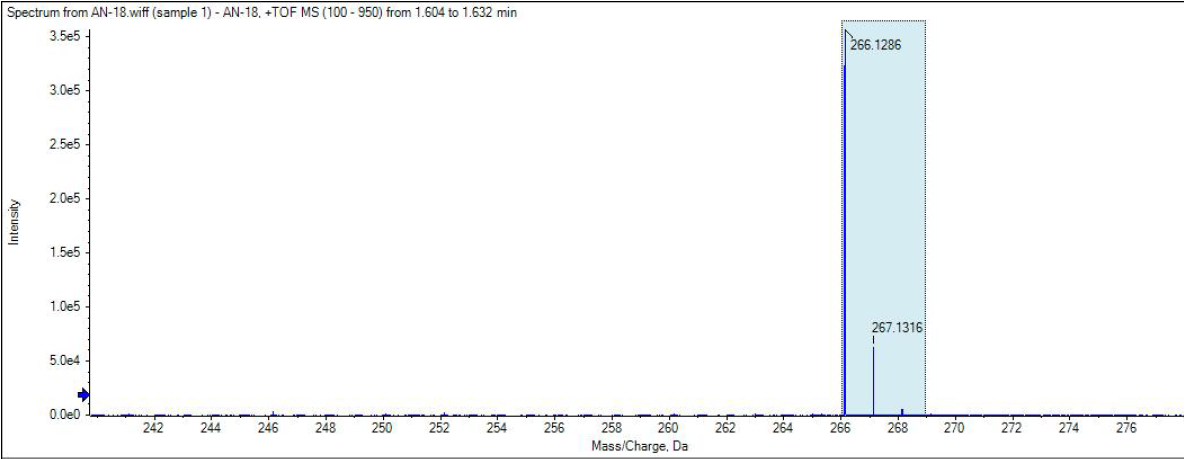


**1,4-diphenyl-1H-1,2,3-triazole (3h)**


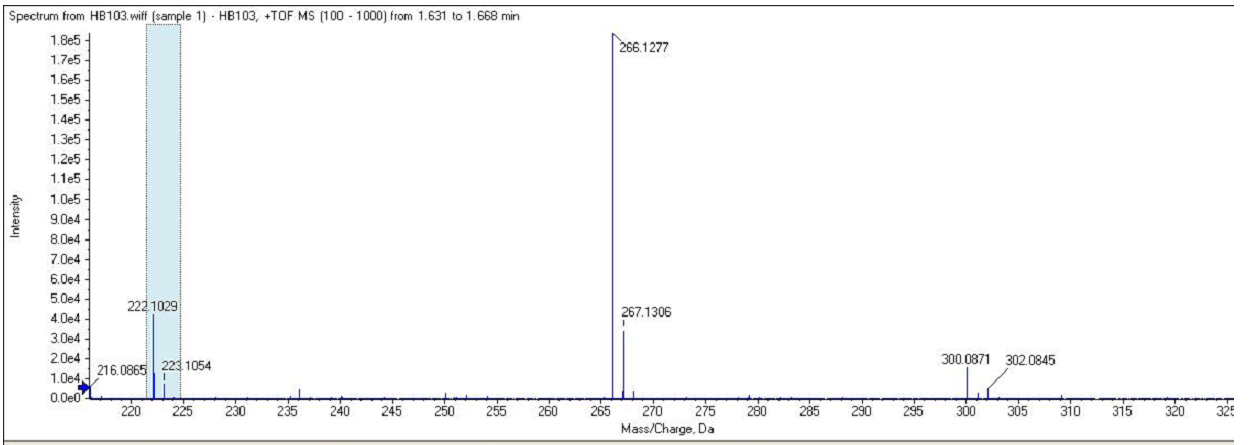


**4-(phenoxymethyl)-1-phenyl-1H-1,2,3-triazole (3i)**


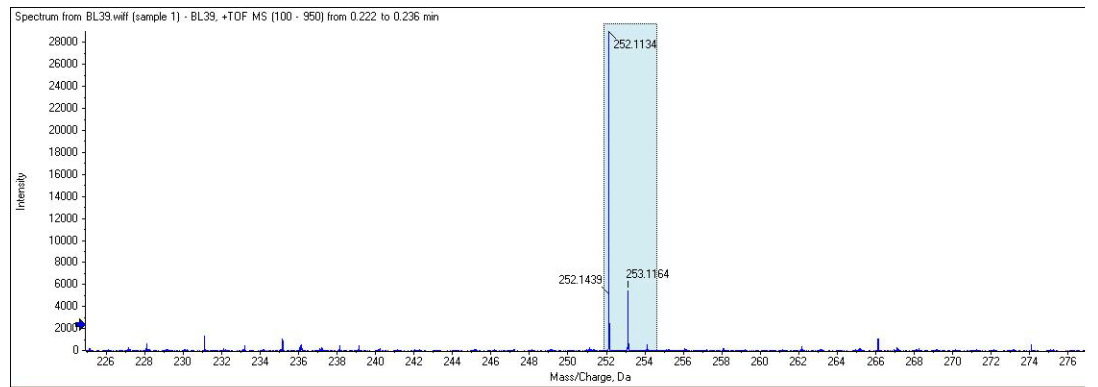


**(1-phenyl-1H-1,2,3-triazol-4-yl)methyl benzoate (3j)**


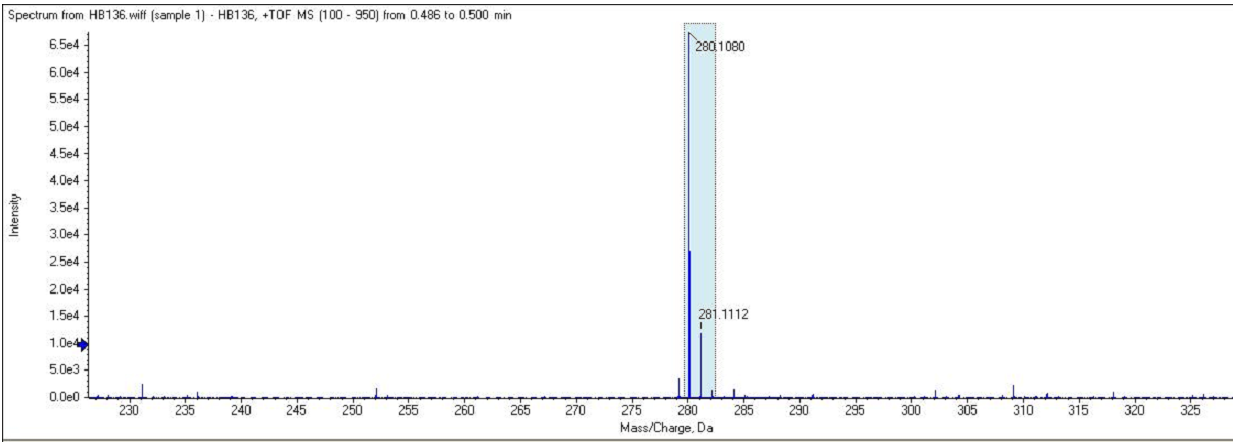

Supplement: Supplementary file 1 [file 36576161]
